# Supplementary material for: Optimal 2D-SIM reconstruction by two filtering steps with Richardson-Lucy deconvolution
Source: PubMed Central journal article supplement (PMC5111067; doi:10.1038/srep37149), 2016-11-16
Supplement: srep37149-s1.pdf [file srep37149-s1.pdf]

1 Optimal 2D-SIM reconstruction by two filtering steps with Richardson-

2 Lucy deconvolution

3

4 Supplementary information

5 Victor Perez, Bo-Jui Chang and Ernst Hans Karl Stelzer\*

6 Buchmann Institute for Molecular Life Sciences (BMLS)

7 Goethe Universität Frankfurt am Main

8 Max-von-Laue-Strasse 15, 60438 Frankfurt am Main, Germany

9

10

11

12

13 **Supplementary Figures**

14 Fig. S1 csiLSFM set-up.

15 Fig. S2 csiLSFM calibration curve.

16 Fig. S3 Apodization function.

17 Fig. S4 High vs. low gain reconstructions with Wiener×Apodization and our reconstruction  
18 approach (RL reconstruction).

19 Fig. S5 Reconstruction dependence on the Apodization function parameters.

20 Fig. S6 Extraction of reconstruction parameters,  $\vec{p}_j$  and  $\phi_j$ , for the HUVEC data set.

21 Fig. S7 HepG2 data set reconstructed with the fairSIM implementation and our  
22 RL-reconstruction.

23 Fig. S8 Deconvolution artifacts when applying a 3D initial deconvolution to SIM stacks.

24 Fig. S9 3D continued deconvolution vs 2D continued deconvolution in plane-by-plane 2D-SIM  
25 reconstructions.

26 Fig. S10 Continued deconvolution enhances the reconstruction contrast.

27 Fig. S11 Initial Deconvolution enhances extraction of spatial frequencies.

28 Fig. S12 RL-reconstruction in external data set.

29 Table S1 Reconstruction parameters of Figure S7.

30 TableS2 Reconstruction parameters of Figure S12.

31

32

33

34

35

36

37

38

39

40

41

42

43

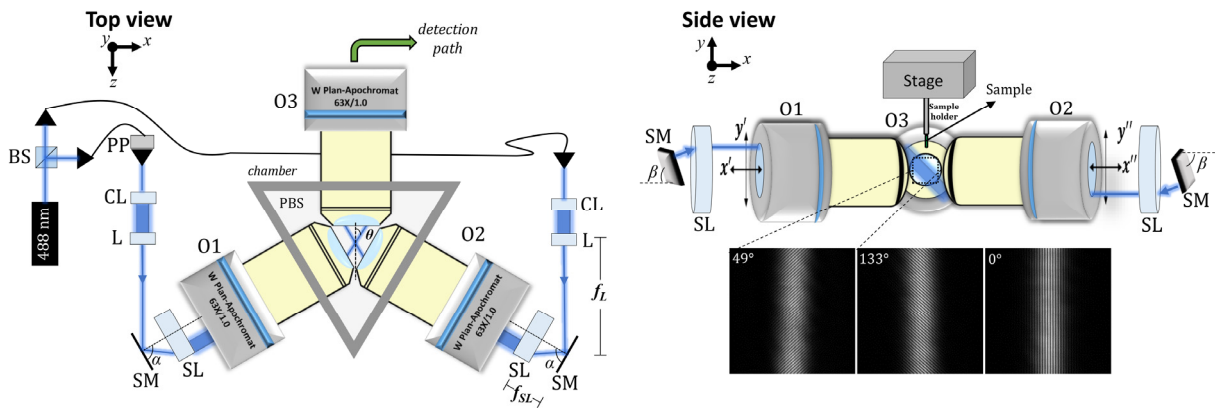

44

45 **Figure S1 csiLSFM set-up.** The beam splitter (BS) divides the laser beam into two coherent  
 46 sources. Each beams is deflected individually into a polarization-preserving, single-mode fiber  
 47 (kineFLEX, Qioptiq). The fiber collimators (F220FC-543, Thorlabs) at the end of the fibers  
 48 deliver collimated beams and form two illumination paths. The chamber is filled with an  
 49 appropriate medium, e.g. phosphate buffered saline (PBS), for biological specimens. The angle  $\alpha$   
 50 defines the pattern period while  $\beta$  defines its orientation. PP: piezo nano-positioner, CL: cylindrical  
 51 lens, L: achromatic lens, SM: scanning mirror, SL: f- $\theta$  lens, O1 and O2: illumination objectives,  
 52 O3: detection objective.

53 Two objectives are used for illumination (O1,O2) and one for detection (O3), the three foci co-  
 54 localize (Fig. S1). The illumination objectives are spread by  $130^\circ$  between their long axes. All  
 55 objectives share the same specifications, i.e. water immersion, and a working distance of 2.1 mm  
 56 (63x/NA1.0, W Plan-Apochromat, 421480-9900-000, Carl Zeiss). The output of each illumination  
 57 objective is a light sheet shaped with a cylindrical lens ( $f=75$  mm, F69-699, Edmund Optics) [1].  
 58 Interference of the two light sheets generates a two-dimensional sinusoidal pattern in the focal  
 59 plane of the detection objective. The period  $T_o$  of the pattern is tuned by varying the half  
 60 interference angle  $\theta$ , which is a function of the angular displacement  $\alpha$  of the scanning mirror (S-  
 61 334.2SL, Physik Instrumente). In each illumination arm the achromatic lens ( $f=200$  mm,

62 G322327322, Qioptiq) and the f-theta scanning lens ( $f=60.5$  mm, S4LFT0061, Sill optics) form a  
63 4f-telecentric system that projects the light sheet into the back focal plane of the illumination  
64 objective.

65 Rotation of the pattern is controlled by tilting the angle  $\beta$  in the scanning mirror, which  
66 correspondingly varies the height  $y'$  and  $y''$  in each arm and anti-symmetrically tilts each light sheet  
67 on the focal plane of the detection objective. Three different orientations  $0^\circ$ ,  $49^\circ$  and  $133^\circ$  of a  
68 pattern with  $T_o=301$  nm are shown. The pattern phase is controlled with the piezo nano-positioner  
69 (P-725.4CD, Physik Instrumente) translating the optical fiber collimator.

70 Features of the csiLSFM are the flexible controls of the pattern period and orientation. It allows  
71 resolution gains larger than the two-fold in a usual SIM due to the decoupling of the detection and  
72 illumination paths. The two-fold constraint is inherent in epi-fluorescence configurations when  
73 using linear emissions since the period  $T_o$  of the pattern is restricted by the angular aperture of the  
74 objective. Maximum resolution gain is achieved when the two light sheets are counter-propagating  
75 ( $\theta=90^\circ$ ). In our experimental conditions ( $\lambda_{exc}=488\text{nm}$ ,  $n=1.333$ ) that angle corresponds to an  
76 illumination pattern with a period of 183 nm.

77 The detection path (not shown) starts with O3 followed by an emission filter (FF02-525/50-25,  
78 Semrock) to block the laser for the observation of the fluorescence signal. A 1x tube lens (452960,  
79 Carl Zeiss) together with the objective is used to form the infinity corrected image. We use a  
80 CMOS camera with a pixel array of 1920x1440 and a pixel pitch of 3.63  $\mu\text{m}$  (C11440, ORCA-  
81 Flash 2.8, Hamamatsu). The three objectives are partially inserted into a customized sealed  
82 polyoxymethylene chamber with an open top for the sample entry. The sample is embedded in  
83 phytigel, agarose, or a coverslip, and is mounted on a rod-like holder parallel to the  $y$  axis. The

84 holder is attached to a 4-axis ( $xyz$  translation and a rotation around  $y$ ) motorized stage (custom-  
85 designed, SmarAct).

86

87

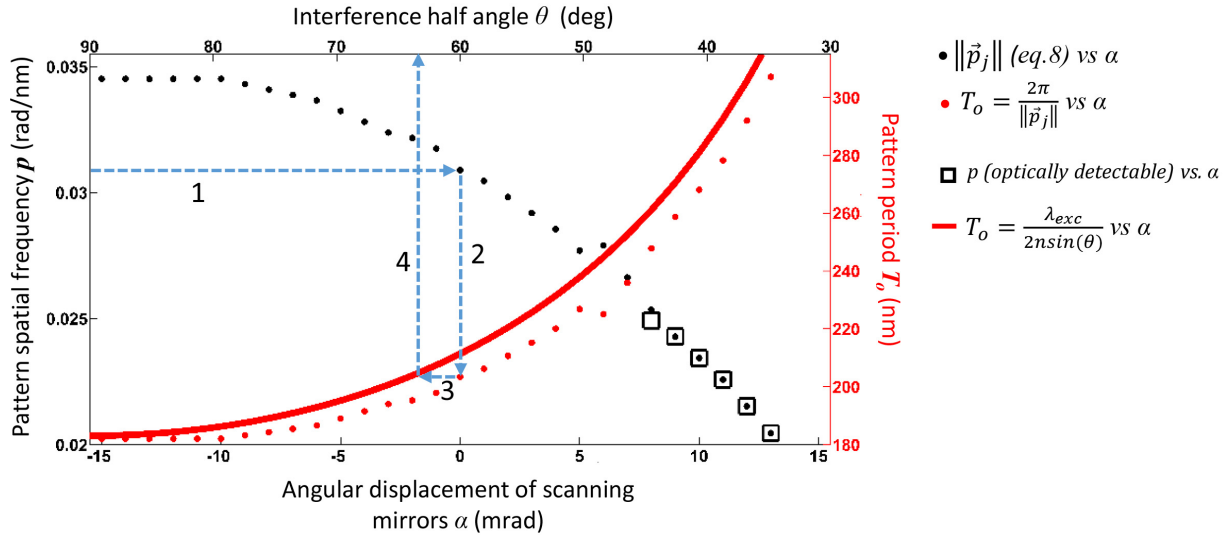

88

89 **Figure S2 csiLSFM calibration curve.** Images of beads are taken at different angular

90 displacements  $\alpha$ , and the norm of the spatial frequency  $\vec{p}_j$  is calculated with equation 8 (black

91 dots). Inverting the values of this curve times  $2\pi$  yields the period  $T_o$  (red dots). Comparing

92 experimental data (red dots) with theoretical values (red solid line) allows an estimation of the half

93 interference angle  $\theta$ . The center of the black squares represents the spatial frequency values

94 obtained from the range of angles  $\alpha$  where the pattern is visible in the detection objective. A good

95 match is found between these optically detected values and the cross-correlation estimates. Finally,

96 from this calibration curve an estimated spatial frequency value expected for other samples can be

97 obtained. The estimated spatial frequency corresponding to angular displacements  $\alpha$  is used as the

98 reference radius for the mask shown in Figure 5c.

99

100

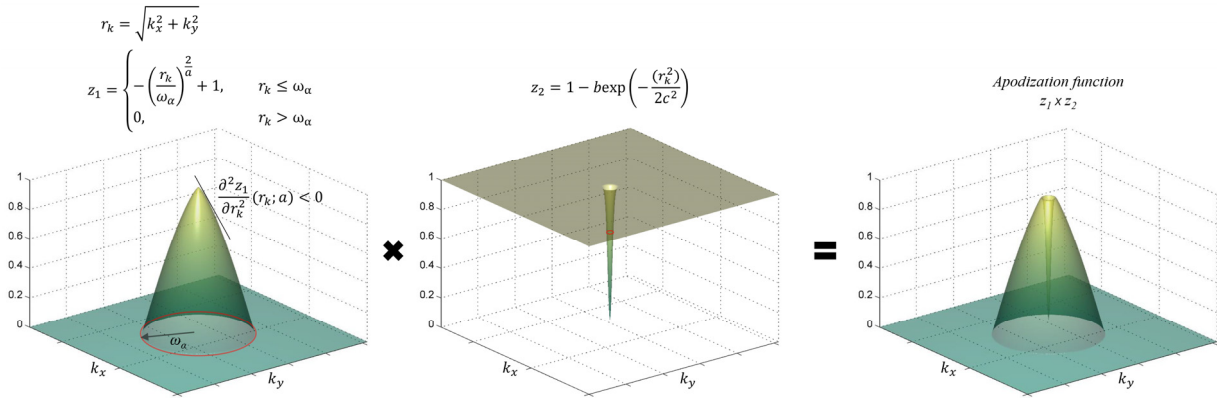

101

102

103 **Figure S3 Apodization function applied to the spectra of the reconstructed image when using**

104 **a Wiener filter to assemble the domains.** This function is formed by the product of  $z_1$  and  $z_2$ .  $z_1$

105 cuts off the frequencies larger than the parameter  $\omega_a$ , whose value is chosen to be around the

106 expected largest frequency. Furthermore, the parameter  $a$  determines the concavity ( $a < 2$ ) or

107 convexity ( $a > 2$ ) of the function surface. A concave surface enhances the high frequencies while a

108 convex one hinders them. Proper tuning of the parameter  $a$  enhances the image quality by

109 suppressing artifacts such as side lobes (Figure S4).  $z_2$  is a function that suppresses out-of-focus

110 signal by reducing the central value of the spectra. The parameter  $b$  defines the strength of the

111 suppression and  $c$  determines the size of the suppressed area.

112

113

114

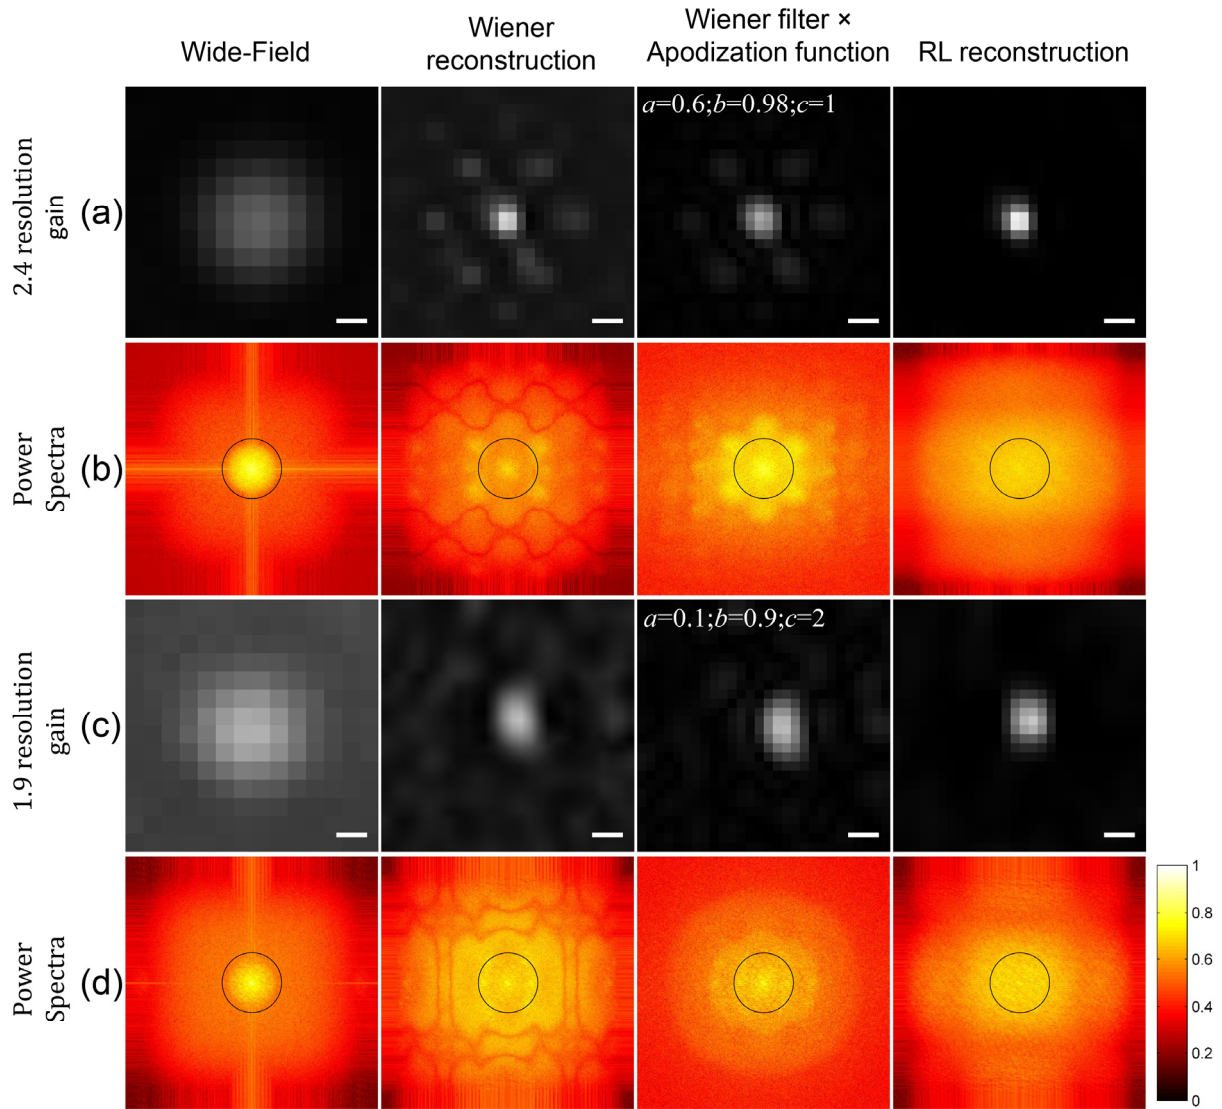

115  
 116 **Figure S4 Reconstructions at high and low resolution gains.** Comparison between  
 117 reconstructions using the Wiener-filter×Apodization approach in references [2], [3] and our  
 118 reconstruction method using the initial and continued deconvolution with the Richardson-Lucy  
 119 algorithm (labeled as RL reconstruction). The comparison concerns the reconstruction effects on  
 120 a point source, which is a bead cropped from a larger field of view with 40 nm fluorescent beads  
 121 embedded in phytigel. **(a)** Wide-field and reconstructions of a sample illuminated with a pattern  
 122 period of 183 nm to achieve a 2.4 resolution gain. Below each image is the corresponding **(b)**  
 123 spectrum of the whole field of view. **(c)** Sample under a 307 nm pattern period, corresponding to



124 a 1.9 resolution gain and **(d)** the spectrum of the whole field of view. Two issues highlight the  
125 importance of this figure: The reconstructions using only the Wiener filter are not optimal, the  
126 bead with 2.4 resolution gain features a petal-like artifact as consequence of its very patchy power  
127 spectrum. For the 1.9 resolution gain no such artifacts occur because the overlap between the  
128 central and extended domains is larger and generates a less patchy spectrum, nevertheless, due to  
129 the out-of-focus background in the wide-field image, the background in the reconstruction contains  
130 features that are not there originally. After applying the apodization function to the spectra of the  
131 Wiener filtered reconstructions and empirically adjusting the parameters  $a$ ,  $b$  and  $c$ , it is possible  
132 to diminish the aforementioned artifacts and improve the reconstructions as demonstrated in the  
133 Wiener×Apodization images. Finally, our approach (RL reconstruction) offers a straightforward  
134 artifact-minimized reconstruction, which is comparable to the one carried out by the  
135 Wiener×Apodization method. The black circle on the spectrums delimits the cut-off frequency of  
136 our detection objective.  $\text{Log}_2$  was applied on the spectrums for better visualization. Scale bar:  
137 100 nm.

138

139

140

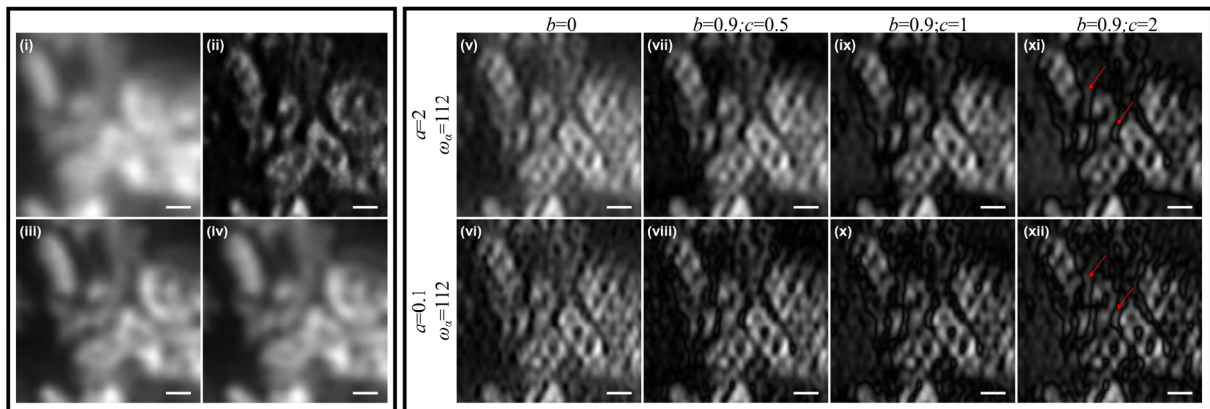

141

142 **Figure S5 Comparison of Wiener×Apodization and RL reconstructions on images of**  
143 **mitochondria in HepG2 cells.** Left side panel: (i) Wide-Field, (ii) RL reconstruction and  
144 deconvolved wide-Field with (iii) RL (10 iterations) and (iv) Wiener algorithms. Right side panel:  
145 (v-xii) Several Wiener×Apodization reconstructions are displayed as a function of the parameters  
146 a, b and c of the apodization function (Fig. S3). Their tuning is necessary to obtain a good  
147 reconstruction. For instance, suppression of the central value of the spectrum with  $b=0.9$  (vii-xii)  
148 provides a better contrast than the images with no suppression,  $b=0$  (v-vi). Also the suppressed  
149 area of the spectrum, proportional to the c parameter, influences the reconstruction. The images  
150 with  $c=1$  (ix-x) have their contrast further improved in comparison to the ones with  $c=0.5$  (vii-viii),  
151 choosing a slightly larger value,  $c=2$ , induces artifacts such as the ones pointed by the red arrows  
152 in (xi). These artifacts are boosted when trying to make the images sharper by emphasizing the  
153 high frequency content by setting  $a=0.1$  (xii). Choosing a reconstruction becomes a user-dependent  
154 matter when using the parameter tuning of the apodization function, this issue is avoided with our  
155 RL reconstruction method (ii). Scale bar: 500nm.

156

157

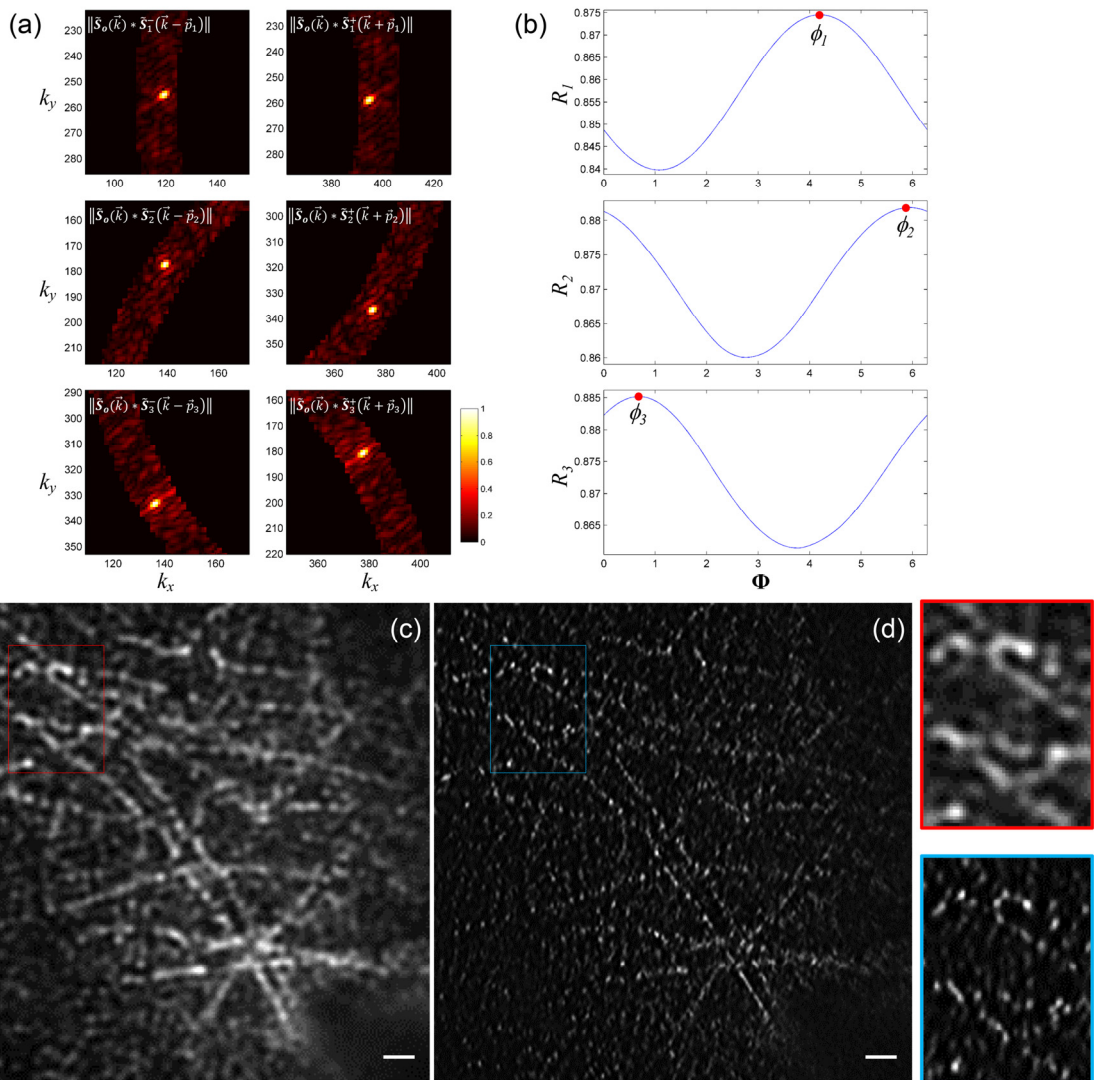

158

159 **Figure S6 Reconstruction parameters extraction for the HUVE cell data set. (a)** Sharp peaks  
 160 are produced when correlating each of the extended domains with the central one. The position of  
 161 those peaks determine the spatial frequencies  $\pm\vec{p}_j$  of the illumination pattern at each  $j$  orientation  
 162 ( $j=1,2,3$ ). **(b)** The initial phases  $\phi_j$  of the illumination pattern are determined from the curves  
 163  $R_j(\Phi)$ . The argument of the maximum in the curves (red dot) defines  $\phi_j$  at each orientation. **(c)**  
 164 Deconvolved wide-Field with 10 iterations of the Richardson-Lucy algorithm. **(d)** Super-resolved  
 165 image obtained through our reconstruction method using the initial and continued deconvolution

166 steps. Magnifications of the selected areas in the red and blue boxes are shown in the rightmost

167 column. Scale bar: 1  $\mu\text{m}$ .

168

169

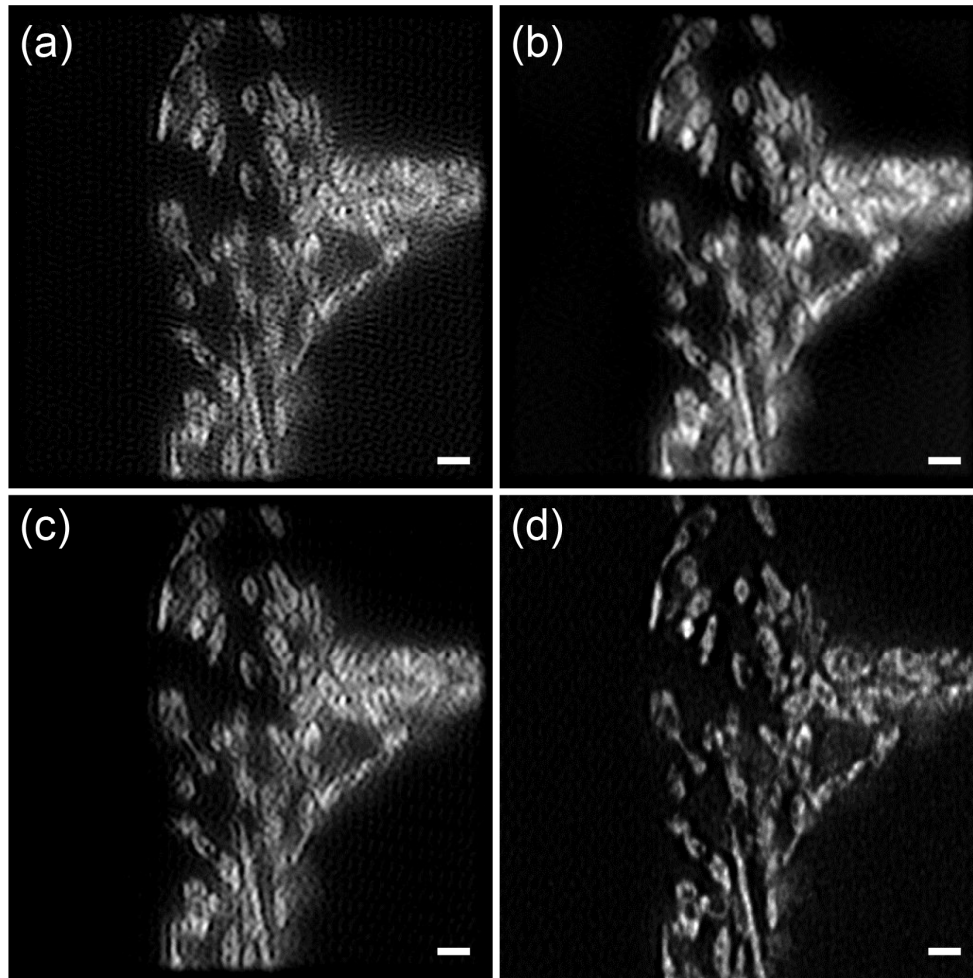

170  
171 **Figure S7 HepG2 data set reconstructed with an open source implementation and with our**  
172 **method.** (a) , (b) and (c) images reconstructed with the ImageJ/Fiji plug-in fairSIM [4]. For each  
173 of these reconstructions a different set of tunable parameters was used (Table S1). Optimization of  
174 the reconstruction was performed by trying out several parameter sets offered by the plug-in to  
175 tune the Wiener filter and the apodization function. About 9 different sets were used. To our  
176 judgement the best reconstructions the plug-in could produce are the ones in (b) and (c). Notice  
177 that in (b) there are less periodic artifacts though less resolution gain than in (c). In (c) the  
178 resolution is higher but artifact occurrence is obvious. On the other hand (d) the image generated  
179 with our RL reconstruction produces, without the need of any parameter tuning, an image with high  
180 contrast/resolution and no visible artifacts. Scale bar: 1  $\mu\text{m}$ .

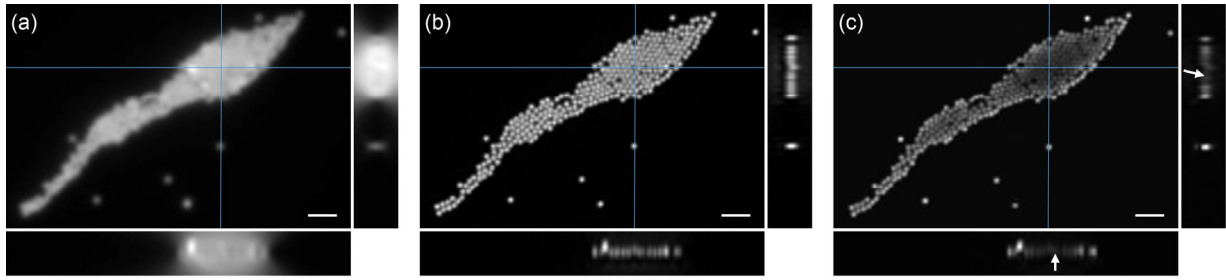

181  
 182 **Figure S8 2D vs 3D initial deconvolution for 3D-SIM stacks.** Applying a 3D initial  
 183 deconvolution to data illuminated with a structured pattern produces artifacts that, in order to be  
 184 avoided, might require the use of 3D spatially variant PSF. This situation is demonstrated with a  
 185 3D stack of 100 nm fluorescent beads imaged in an OMX commercial set-up. Orthogonal view of:  
 186 **(a)** Wide field. **(b)** 3D-SIM reconstruction applying our 2D initial deconvolution approach. **(c)** 3D-  
 187 SIM reconstruction applying a 3D initial deconvolution. The 3D initial deconvolution was applied  
 188 to the 5 stacks produced at each phase step, i.e. all the planes comprising a given stack have the  
 189 same illumination phase. Reconstructions were carried using the 3D-SIM equations in [2]. Beads  
 190 in (b) are properly reconstructed with no artifacts present in the image. In contrast, the  
 191 reconstruction in (c) displays an intensity variation across the whole field of view, reaching a  
 192 dramatic reduction in the center of the beads cluster (white arrows). Such situation points out to  
 193 the need of a 3D spatially variant PSF to compensate for those variations. To avoid such  
 194 complication in the initial deconvolution and keep our pipeline robust we stick to a 2D  
 195 deconvolution, which as observed in (b) does not lead to any deconvolution related artifacts. Scale  
 196 bar: 1  $\mu\text{m}$ .

197  
 198  
 199  
 200  
 201

202

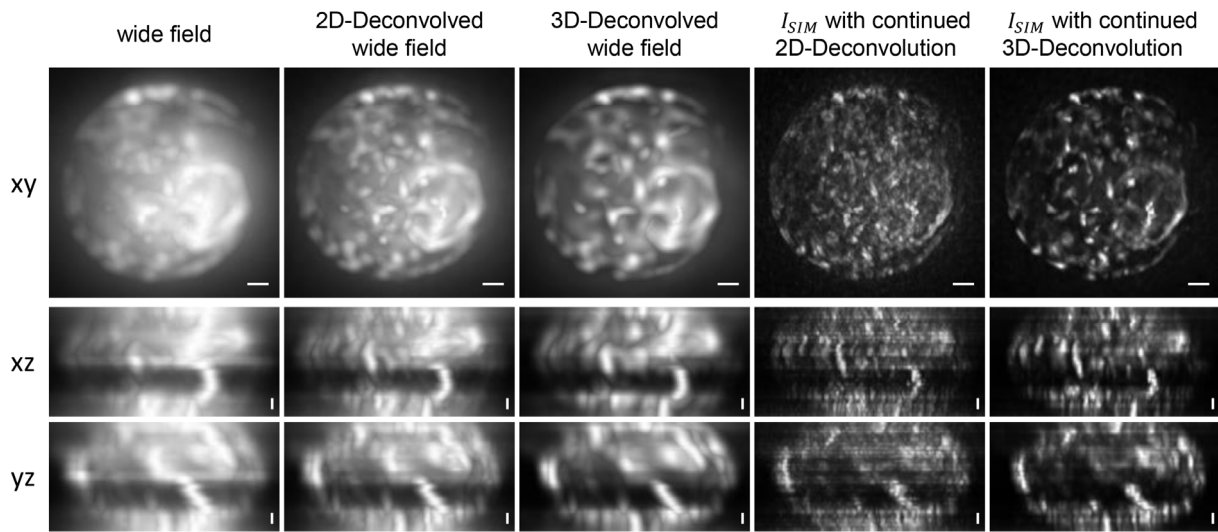

203

204 **Figure S9 Maximum Projections in xy, xz and yz planes of a Yeast 3D stack.** The images  
205 display the resolution enhancement when applying a plane-by-plane 2D deconvolution or a 3D  
206 deconvolution to the wide field image. Although the 2D deconvolution does not efficiently  
207 eliminate the out-of-focus background it emphasizes the in-focus signals over it. The 3D  
208 deconvolution allows easier identification of structures along the z-axis. In the same manner, a 3D  
209 continued deconvolution can be applied to the plane-by-plane 2D-SIM reconstruction to improve  
210 the axial resolution in comparison to the 2D continued deconvolution. Images were acquired with  
211 our set-up. Scale bar: 500 nm.

212

213

214

215

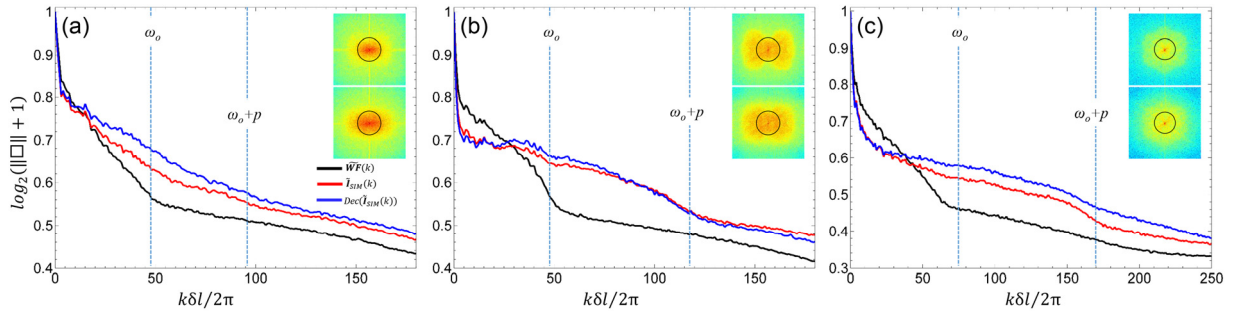

216

217 **Figure S10 The continued deconvolution enhances contrast by re-distributing the spectra of**  
 218 **the reconstruction.** The circular average of the power spectrum of the wide field (black line), RL  
 219 reconstruction ( $I_{SIM}$ , red line) and  $I_{SIM}$  with continued deconvolution (blue line) is presented for  
 220 three different image data sets: **(a)** HepG2 cell, **(b)** HUVE cell and **(c)** TIRF-SIM microtubules.  
 221 The complete power spectrum of the reconstruction is shown in the top left corner insets. Upper  
 222 box:  $I_{SIM}$ . Lower box: deconvolved  $I_{SIM}$ . Vertical lines indicate the cut-off frequency of the wide  
 223 field ( $\omega_o$ ) and the cut-off frequency ( $\omega_o+p$ ) of the SIM reconstructions, with  $p$  denoting the norm  
 224 of the pattern spatial frequency. Constants  $\delta$  and  $l$  in the x-axis label denote the pixel-size and the  
 225 image length in pixels. Plots (a) and (b) show that the blue curve lies above the red curve in the  
 226 range of middle and high spatial frequencies, only to converge to the same noise baseline passing  
 227 the frequency  $\omega_o+p$ . This situation indicates a contrast improvement of the deconvolved  $I_{SIM}$  image  
 228 rather than an increase in frequencies beyond  $\omega_o+p$ . In plot (c) the blue curve is found above the  
 229 red one beyond  $\omega_o+p$ . Such case might indicate a slight resolution gain due to the non-negativity  
 230 constraint of the RL algorithm [5,6].

231

232

233

234

235



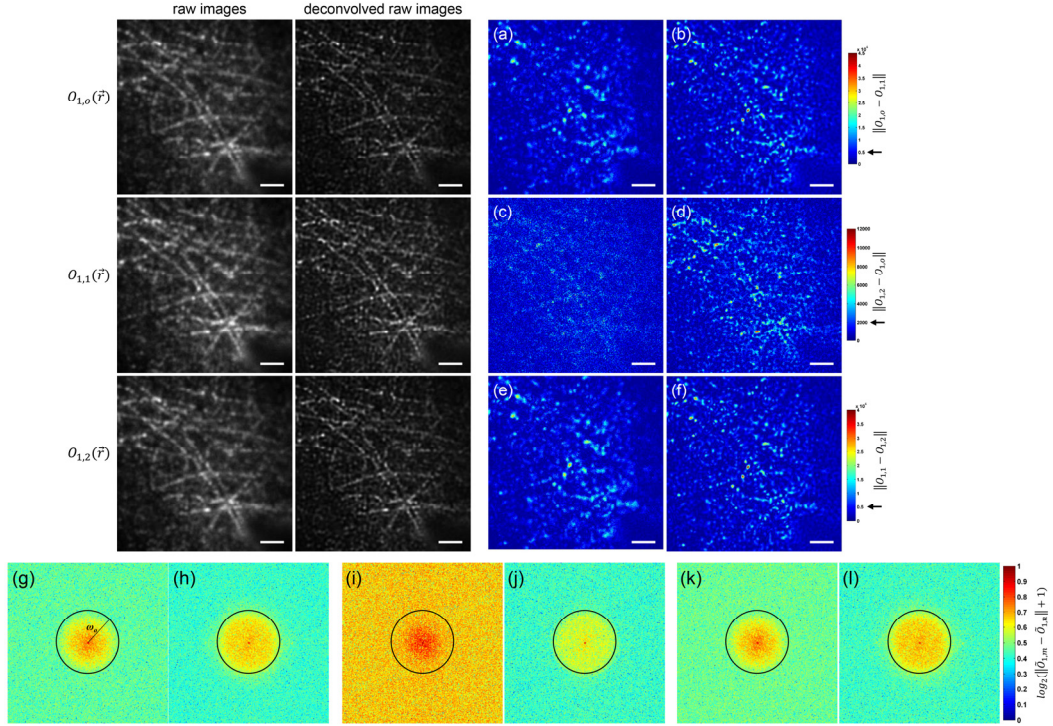

236

237 **Figure S11 The initial deconvolution enhances the extraction of high frequencies.** The

238 extended domains  $\tilde{\mathcal{S}}_j^\pm$  that carry the high spatial frequencies are formed by the differences between

239 the  $\tilde{\mathcal{O}}_{j,m}$  images acquired with the different  $m$  phases of the pattern (Eq. 7). The initial

240 deconvolution increases the modulation, i.e. it increases these differences over a given background.

241 These represents a two-fold advantage, because it enhances the extraction of high frequencies and

242 also allows the recovery of features in the image where the modulation in the raw images was not

243 enough to represent a resolution gain. To illustrate this, the absolute value of the intensity

244 differences  $O_{1,m} - O_{1,n}$  has been calculated for the raw images in (a) , (c), and (e) and also for the

245 deconvolved raw images in (b) , (d), and (f). Respectively their power spectrum is shown in (g),

246 (i) , (k) and (h), (j) , (l) . Consistently one can observe that the background level (black arrows)

247 remains the same for each pair (a)-(b), (c)-(d) and (e)-(f), but using the deconvolved raw images to

248 calculate the differences allows to salvage signals from background levels in comparison to the

249 differences calculated only with the raw images. This effect is very obvious in (c)-(d), since in (c)

250 image features are barely recognizable, whereas in (d) many features have been successfully  
251 recovered and lie above background levels. Such recovered features represent more information  
252 that can be incorporated into the extended domains  $\tilde{\mathbf{S}}_j^\pm$  as seen in the spectra (i)-(j). Hence the  
253 initial deconvolution allows the recovery of image features that might be buried in the background  
254 due to a low pattern modulation, this is specially useful when using resolution gains  $\geq 2$ , since this  
255 involves illumination patterns with a spatial frequency in the limits of the cut-off frequency  $\omega_0$ ,  
256 situation that inherently leads to low modulations. Scale bar: 2  $\mu\text{m}$ .

257

258

259

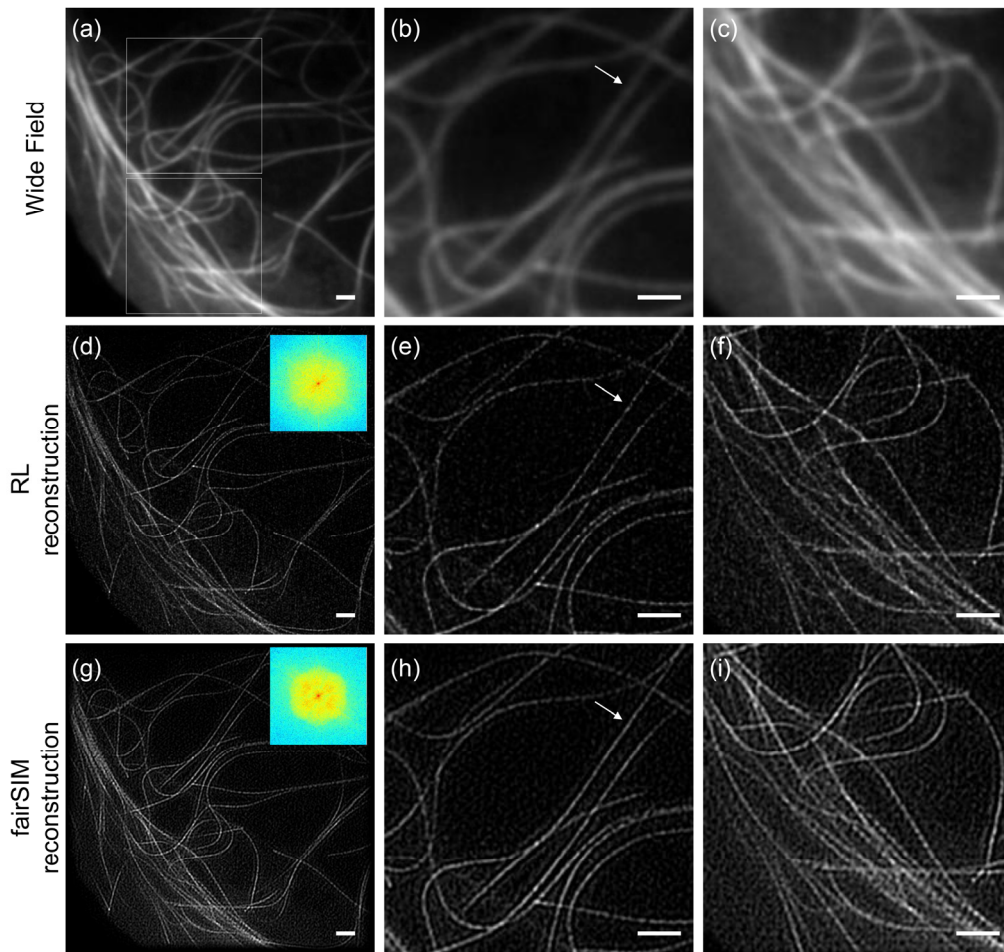

260

261

262 **Figure S12 Testing RL reconstruction with an external data set.** A TIRF-SIM data set of  
 263 tubulin emitting at 525 nm was reconstructed with the fairSIM implementation and our two step  
 264 deconvolution approach. The first row shows the (a) wide field and expansions of the its (b) upper  
 265 and (c) lower halves. Similarly the second and third row display the (d) RL and (g) fairSIM  
 266 reconstructions, with their corresponding power spectra on the top left corner inset. The region in  
 267 (b) has a cleaner background in contrast with (c) which presents a high background signal. These  
 268 two regions are used to compare slight differences between the two reconstruction approaches for  
 269 this particular image set. Firstly, microtubules in region (h) appear more continuous and with

270 higher intensity than in (e), to the point that for some microtubules (white arrows) these two  
271 features do not match with the intensities displayed in the wide field (b). This difference can be  
272 explained if one observes that the spectra of (d) seems more evened out in comparison to the spectra  
273 of (g) which has more emphasis on the low central frequencies and a ring-like area of dimmed  
274 middle range frequencies. A second difference is noticed in the high background areas (c), e.g.  
275 due to the initial deconvolution the reconstruction in (f) appears to have a cleaner background than  
276 (i). In spite of these differences, both reconstructions are practically the same in terms of overall  
277 structures and features present in the images. The data set as well as the input parameters for the  
278 fairSIM reconstruction were downloaded from the fairSIM website [4]. These parameters along  
279 with the parameters extracted by our reconstruction approach can be found in Table S2. Scale bar:  
280 1  $\mu\text{m}$ .

281

282

283

284

285

286

287

288

289

290

| Reconstruction           | Period <sub>1</sub> (nm) / angle (°) | Period <sub>2</sub> (nm) / angle(°) | Period <sub>3</sub> (nm) / angle(°) | strength | FWHM | Wiener Parameter | Apodization cut-off |
|--------------------------|--------------------------------------|-------------------------------------|-------------------------------------|----------|------|------------------|---------------------|
| (a)fairSIM*              | 305.57 / 0.04                        | 293.94 / -26.99                     | 292.28 / 26.74                      | 0.99     | 0.15 | 0.05             | 2                   |
| (b)fairSIM*              | 305.57 / 0.04                        | 293.94 / -26.99                     | 292.28 / 26.74                      | 0.99     | 1.2  | 0.2              | 1.5                 |
| (c) fairSIM*             | 305.57 / 0.04                        | 293.94 / -26.99                     | 292.28 / 26.74                      | 0.99     | 0.15 | 0.2              | 2                   |
| (d) RL Reconstruction**† | 307.20 / 0                           | 295.71 / -26.82                     | 293.086 / 26.5651                   | –        | –    | –                | –                   |

\*PSF of NA 1 and emission wavelength of 515 nm.  
† 10 iterations for the initial deconvolution. 5 iterations for the continued deconvolution.

291  
292 **Table S1 Reconstruction parameters of the HepG2 data set (Fig. S7).** The step size of the  
293 pattern phases in all reconstructions is 120°. The initial phase is not presented since it is a relative  
294 value whose value depends on the chosen range of angles.

295  
296

| Reconstruction       | Period <sub>1</sub> (nm) / angle (°) | Period <sub>2</sub> (nm) / angle(°) | Period <sub>2</sub> (nm) / angle(°) | strength | FWHM | Wiener Parameter | Apodization cut-off |
|----------------------|--------------------------------------|-------------------------------------|-------------------------------------|----------|------|------------------|---------------------|
| fairSIM*             | 179.70 / -89.26                      | 178.61 / -28.90                     | 178.26 / 30.50                      | –        | –    | 0.1              | 2                   |
| RL Reconstruction**† | 180.18 / -89.04                      | 178.83 / -28.84                     | 178.10 / 30.53                      | –        | –    | –                | –                   |

\*PSF of NA 1.49 and emission wavelength of 525 nm.  
† 10 iterations for the initial deconvolution. 5 iterations for the continued deconvolution.

297  
298 **Table S2 Reconstruction parameters of the TIRF-SIM data set (Fig. S12).** The step size of the  
299 pattern phases in all reconstructions is 120°. The initial phase is not presented since it is a relative  
300 value whose value depends on the chosen range of angles. As suggested by reference [4] a  
301 correction of 405 was applied to the raw images to compensate for camera noise.

302  
303  
304  
305  
306  
307  
308  
309

310

311

312

313

314 1. Greger, K., Swoger, J. & Stelzer, E. H. K. Basic building units and properties of a  
315 fluorescence single plane illumination microscope. *Rev. Sci. Instrum.* **78**, 23705 (2007).

316 2. Gustafsson, M. G. L. *et al.* Three-dimensional resolution doubling in wide-field  
317 fluorescence microscopy by structured illumination. *Biophys. J.* **94**, 4957–70 (2008).

318 3. Wicker, K., Mandula, O., Best, G., Fiolka, R. & Heintzmann, R. Phase optimisation for  
319 structured illumination microscopy. *Opt. Express* **21**, 2032–2049 (2013).

320 4. Müller, M., Mönkemöller, V., Hennig, S., Hübner, W. & Huser, T. Open-source image  
321 reconstruction of super-resolution structured illumination microscopy data in ImageJ. *Nat.*  
322 *Commun.* **7**, 10980 (2016).

323 5. Sementilli, P. J., Hunt, B. R. & Nadar, M. S. Analysis of the limit to superresolution in  
324 incoherent imaging. *J. Opt. Soc. Am. A* **10**, 2265 (1993).

325 6. VERVEER, P. J., GEMKOW, M. J. & JOVIN, T. M. A comparison of image restoration  
326 approaches applied to three-dimensional confocal and wide-field fluorescence microscopy.  
327 *J. Microsc.* **193**, 50–61 (1999).

328

329

330

331
